# Supplementary material for: Activated macrophage-targeted dextran–methotrexate/folate conjugate prevents deterioration of collagen-induced arthritis in mice
Source: Royal Society of Chemistry journal article supplement (doi:10.1039/c5tb02479j), 2016-01-01
Supplement: c5tb02479j1.pdf [file c5tb02479j1.pdf]

## Electronic Supplementary Information

### Activated macrophage-targeted dextran–methotrexate/folate conjugate prevents deterioration of collagen-induced arthritis in mice

Modi Yang,<sup>a</sup> Jianxun Ding,<sup>\*b</sup> Ying Zhang,<sup>b</sup> Fei Chang,<sup>\*c</sup> Jincheng Wang,<sup>c</sup> Zhongli Gao,<sup>\*a</sup> Xiuli Zhuang<sup>b</sup> and Xuesi Chen<sup>b</sup>

<sup>a</sup>Department of Orthopedics, China-Japan Union Hospital of Jilin University, Changchun 130033, P. R. China. E-mail: zhongligao@sina.com

<sup>b</sup>Key Laboratory of Polymer Ecomaterials, Changchun Institute of Applied Chemistry, Chinese Academy of Sciences, Changchun 130022, P. R. China. E-mail: jxding@ciac.ac.cn

<sup>c</sup>Department of Orthopedics, The Second Hospital of Jilin University, Changchun 130041, P. R. China. E-mail: ccfei\_cn@hotmail.com

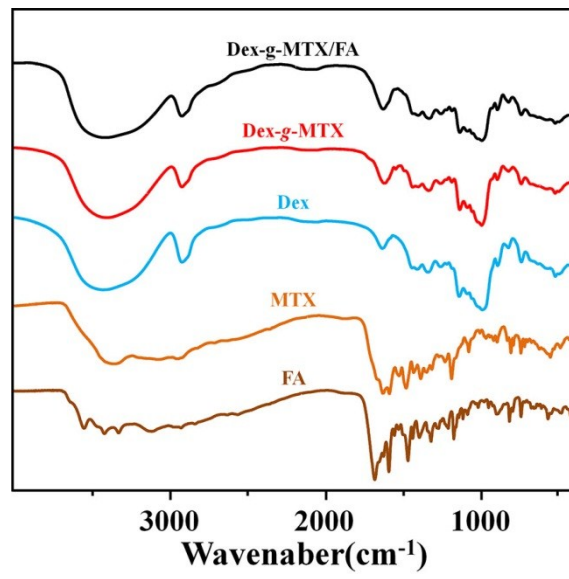

**Fig. S1** FT-IR spectra of Dex-g-MTX/FA, Dex-g-MTX, Dex, MTX, and FA.

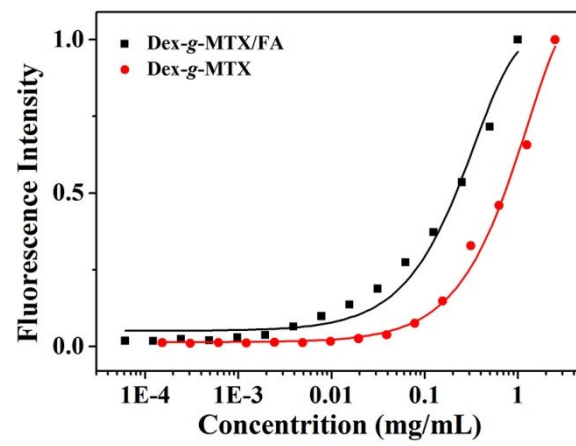

**Fig. S2** Critical micelle concentrations (CMCs) of Dex-g-MTX/FA and Dex-g-MTX.

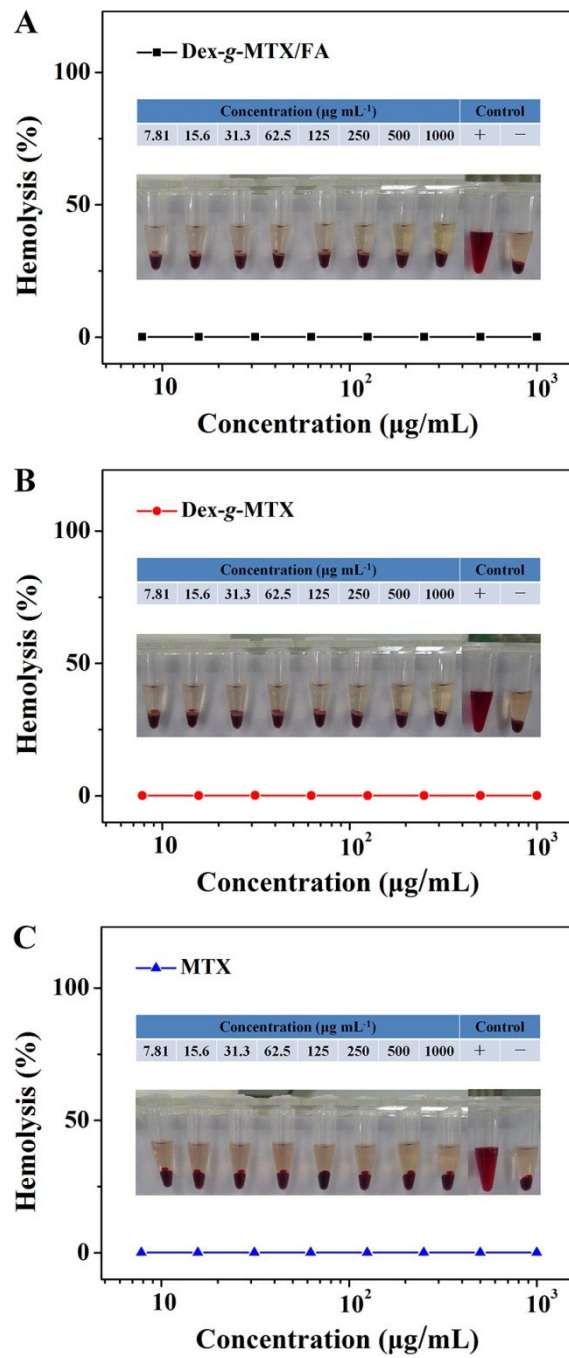

**Fig. S3** Hemolysis of Dex-g-MTX/FA (A), Dex-g-MTX (B), and free MTX (C). Data were presented as mean  $\pm$  standard deviation ( $n = 3$ ).

**Table S1** Morphological features of synovium

| Feature                                                                                                                                                                   | Score |
|---------------------------------------------------------------------------------------------------------------------------------------------------------------------------|-------|
| A. Hyperplasia or enlargement of synovial lining cell layer                                                                                                               |       |
| 1. Absent                                                                                                                                                                 | 0     |
| 2. Slight enlargement (two to three cell layers). Giant cells are very rare                                                                                               | 1     |
| 3. Moderate enlargement (four to five cell layers). Some giant cells or lymphocytes                                                                                       | 2     |
| 4. Strong enlargement (more than six cell layers). Giant cells and lymphocytes are frequent                                                                               | 3     |
| B. Inflammatory infiltration                                                                                                                                              |       |
| 1. Absent                                                                                                                                                                 | 0     |
| 2. Slight inflammatory infiltration (diffusely located single cells and small perivascular aggregates of lymphocytes and/or plasma cells)                                 | 1     |
| 3. Moderate inflammatory infiltration (perivascular and/or superficial lymphatic aggregates, and small sized lymphatic follicles without germinal center may be observed) | 2     |
| 4. Strong inflammatory infiltration (lymphatic follicles with germinal center and/or confluent subsynovial lymphatic infiltration)                                        | 3     |
| C. Activation of synovial stroma/pannus formation                                                                                                                         |       |
| 1. Absent                                                                                                                                                                 | 0     |
| 2. Slight synovial stroma activation (low cellularity with slight edema, slight fibrosis with some fibroblast, no giant cells)                                            | 1     |
| 3. Moderate synovial stroma activation (moderate cellularity with a moderate density of fibroblasts, endothelial cells, and giant cells may be detected)                  | 2     |
| 4. Strong synovial stroma activation (high cellularity with dense distribution of fibroblasts and endothelial cells, and giant cells are abundant)                        | 3     |

**Table S2** Modified OARSI scores to evaluate the cartilage status microscopically

| Feature                                                               | Score |
|-----------------------------------------------------------------------|-------|
| <b>A. Structure</b>                                                   |       |
| 0. Normal                                                             | 0     |
| 1. Slight surface irregularities                                      | 1     |
| 2. Moderate surface irregularities                                    | 2     |
| 3. Severe surface irregularities                                      | 3     |
| 4. Clefts/fissures into transitional zone (one-third depth)           | 4     |
| 5. Clefts/fissures into radial zone (two-thirds depth)                | 5     |
| 6. Clefts/fissures into calcified zone (full depth)                   | 6     |
| 7. Fibrillation and/or erosion to transitional zone (one-third depth) | 7     |
| 8. Fibrillation and/or erosion to radial zone (two-thirds depth)      | 8     |
| 9. Fibrillation and/or erosion to calcified zone (full depth)         | 9     |
| 10. Fibrillation and/or erosion to subchondral bone                   | 10    |
| <b>B. Cellularity</b>                                                 |       |
| 0. Normal                                                             | 0     |
| 1. Increase or slight decrease                                        | 1     |
| 2. Moderate decrease                                                  | 2     |
| 3. Severe decrease                                                    | 3     |
| 4. No cells present                                                   | 4     |
| <b>C. Chondrocyte cloning</b>                                         |       |
| 0. Normal                                                             | 0     |
| 1. Several doublets                                                   | 1     |
| 2. Many doublets                                                      | 2     |
| 3. Doublets and triplets                                              | 3     |
| 4. Multiple cell nests                                                | 4     |
